# Supplementary material
Source: Royal Society of Chemistry journal article supplement (doi:10.1039/d6ew00117c)
Supplement: d6ew00117c1.pdf [file d6ew00117c1.pdf]

## Supplementary Information (SI)

### SI1. Standard Operating Protocol (SOP) for the Multiple-Straining Method

The SOP for the multiple-straining method used to analyse and count *Ascaris* eggs from the biodigesters and the control systems. The following steps provide a detailed description of the procedures illustrated in **Fig. 3**:

1. Wear lab coats, face masks, and gloves, and prepare all materials required for the multiple-straining method according to a checklist.
2. Place a graduated plastic cup on a digital weighing scale, tare to zero, and weigh 10 g of the vermicompost sample using a steel spatula.
3. Add tap water to the 80 mL mark and mix thoroughly using a steel spatula.
4. Assemble the Flukefinder sieve set in order of decreasing sieve size (#1 = 189  $\mu\text{m}$ , #2 = 104  $\mu\text{m}$ , #3 = 59  $\mu\text{m}$ ) from top to bottom.
5. Position the Flukefinder sieve set slightly slanted over a 3 L graduated plastic jug, ensuring the top of the sieve is away from personnel, and the holes face upwards.
6. Gradually transfer the well-mixed vermicompost sample from the graduated cup onto the top of the Flukefinder sieve set, gently shaking the sieves by hand or against the side of the jug to facilitate passage. Care should be taken to prevent overflow.
7. Rinse the graduated plastic cup three to five times with tap water and repeat the transfer procedure.
8. Sequentially rinse each sieve (#1 to #3) with tap water until the effluent passing into the 3 L jug appears visually clear.
9. Carefully pour the collected material from the jug onto a 20  $\mu\text{m}$  sieve, holding the sieve by hand and gently shaking to distribute the sample.

- 24 **10.** Rinse the jug three times, pouring the rinse over the 20  $\mu\text{m}$  sieve as described in  
25 step 9.
- 26 **11.** Collect the material retained on the 20  $\mu\text{m}$  sieve and transfer it to a plastic cup by  
27 rinsing with tap water.
- 28 **12.** Transfer the combined sample from the plastic cup into 50 mL plastic conical tubes.
- 29 **13.** Centrifuge the tubes at 5,000 revolutions per minute (rpm) for 5 minutes.
- 30 **14.** Carefully decant the supernatant until the remaining sediment volume is less than 5  
31 mL. If the sediment exceeds 5 mL, repeat centrifugation (step 13) and decantation as  
32 necessary.
- 33 **15.** Mix the sediment thoroughly and adjust the volume to 5 mL if required.
- 34 **16.** Take a 50  $\mu\text{L}$  aliquot of the sediment, place it on a microscope slide, and cover with  
35 a coverslip.
- 36 **17.** Examine the prepared smear under a microscope and enumerate *Ascaris* eggs.
- 37 **18.** Please note that, similarly, 10 g of sample was used for processing the coir and pig  
38 faeces layers. However, for the gravel layer, 1,000 g of sample was processed  
39 following the same SOP (steps 1–17), as the total gravel mass exceeded 15 kg in both  
40 the biodigesters and control units. The sediment volume (step 14) was kept at 10 mL  
41 to facilitate slide preparation and microscopic examination, since reducing it to 5 mL  
42 resulted in excessive solids that made slide reading difficult.

43

44

45

46

47

## SI2. Separation of vermicompost within the coir layer

48 Post feeding, TWT biodigesters were left undisturbed for an additional time (six weeks for  
49 the first experiment; 6, 10, and 14 weeks for the second experiment) to allow the tiger  
50 worms to decompose the remaining pig faeces and facilitate vermicompost formation. It  
51 was observed that vermicompost was formed in the coconut coir layer, with some of it  
52 dispersed into the gravel layer. To separate vermicompost from the coconut coir layer,  
53 the following steps were performed:

54 **1.** At the end of the resting period, the coir layer from each biodigester was collected  
55 separately in a 10 L bucket and labelled accordingly (e.g., B1 bucket, B2 bucket). This  
56 layer contained vermicompost, tiger worms, and their cocoons.

57 **2.** Tiger worms and cocoons were manually separated from each bucket and transferred  
58 into labelled 2 L containers (e.g., B1 tiger worms, B2 tiger worms) containing 250 g of  
59 new coir to provide a similar environment for the tiger worms. The labels corresponded  
60 to their original buckets to ensure that the tiger worms could be returned to the same  
61 biodigester after the vermicompost was separated from the corresponding layer.

62 **3.** Now the coir from each bucket was free of tiger worms and cocoons; it was mixed  
63 thoroughly and homogenised. Afterwards, fresh coir samples were taken for  
64 processing and *Ascaris* eggs counting, while the remaining sand was placed in fibre  
65 trays (40 × 28 × 8 cm), which were labelled accordingly (e.g., B1 coir layer, B2 coir  
66 layer, etc.).

67 **4.** The trays, now containing vermicompost and coir, were kept air-drying at  $25 \pm 1$  °C  
68 for five days (**Fig. SI2.1**). This drying step helped distinguish the coir (which will remain  
69 fibrous) from the finer vermicompost.

70 5. Once dried, the contents of each tray were sieved using a round sieve set (30 cm in  
71 diameter) with mesh sizes of 12 mm, 10 mm, 8 mm, 5 mm, 3 mm, and 1 mm (**Figs.**  
72 **SI2.2** and **SI2.3**).

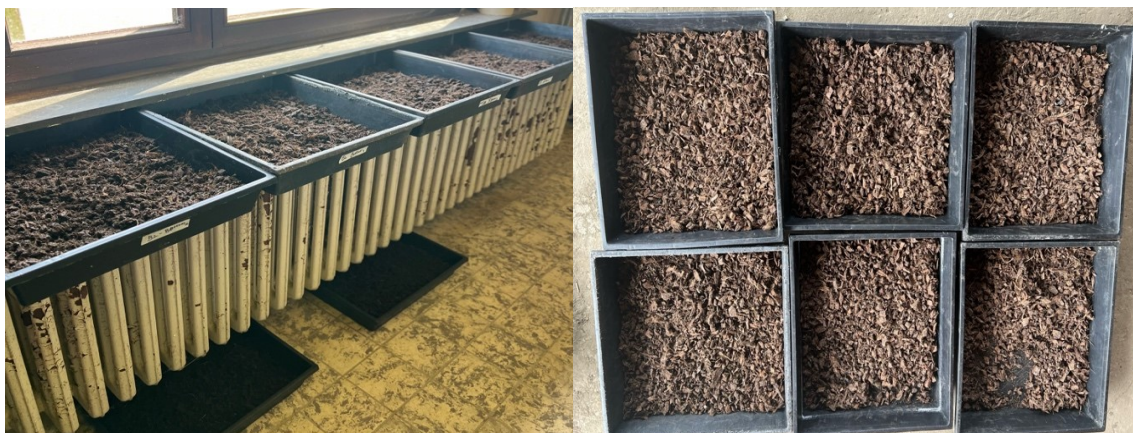

73 *Figure SI2.1: Trays with coir and vermicompost kept for drying (left), and dried coir and*  
74 *vermicompost after five days (right).*

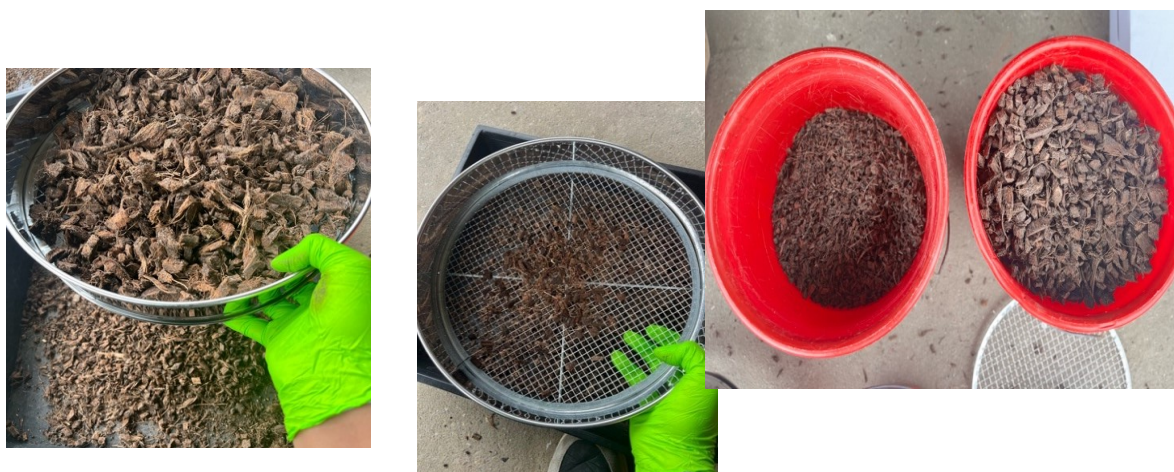

76 *Figure SI2.2: Separation of coir and vermicompost using different sieves*  
77

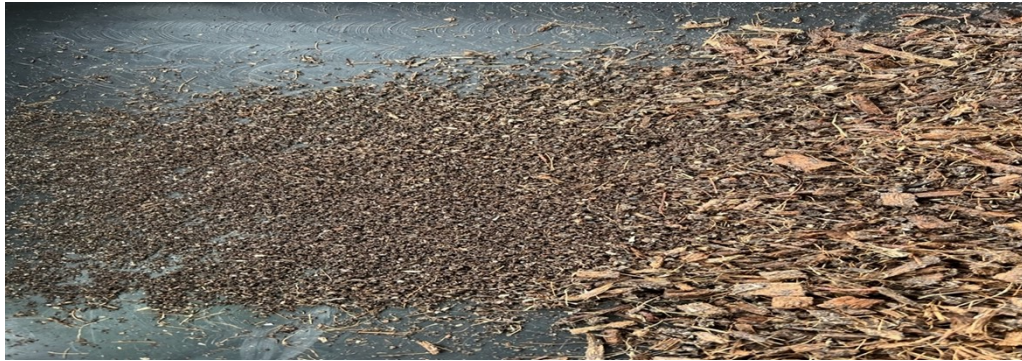

78

79 **Figure SI2.3: Distinct visible materials in a tray: vermicompost (left) and coconut coir (right)**

80 **6.** The sieved vermicompost from each tray (**Fig. SI2.4**) was collected, weighed, and  
81 stored in airtight bags for use in the validation experiment.

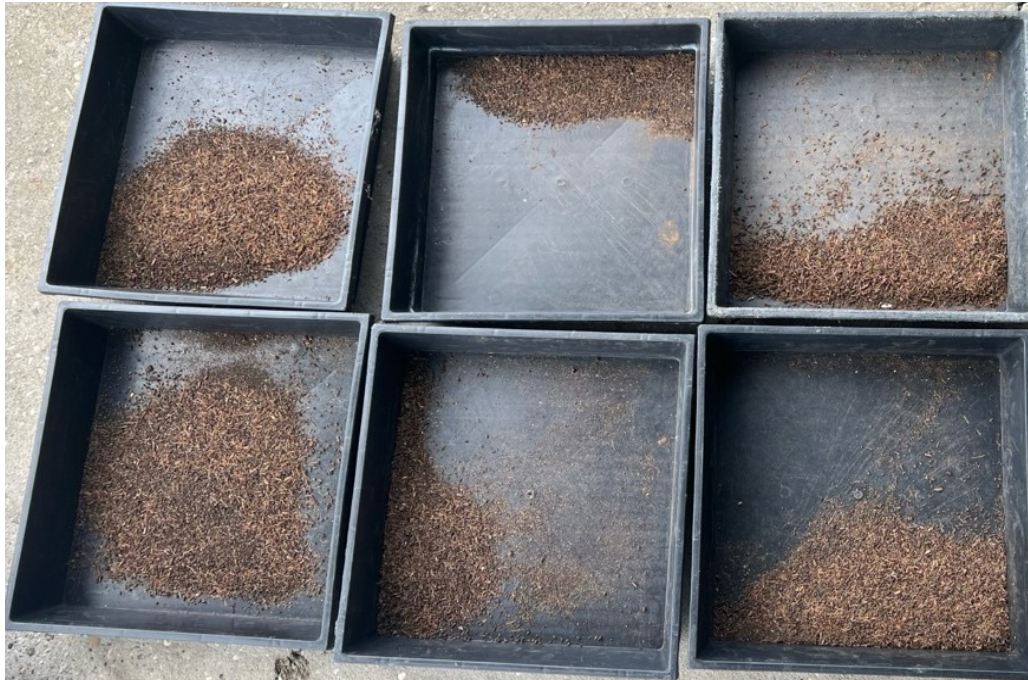

82

83

***Figure SI2.4: Vermicompost separated from each biodigester***

84 The vermicompost samples were examined under a light microscope at 100×  
85 magnification to assess texture and particle size. The vermicompost resembled dark  
86 brown to black soil in colour and texture, with small coir fragments present. The samples  
87 were also compared to a reference vermicompost obtained from the earthworm supplier.  
88 Both samples showed similar physical characteristics, although the experimental  
89 vermicompost contained a slightly higher proportion of fibrous coir.

90

91

92

93

94

95 **SI3. Protocol for feeding tiger worms with faeces spiked with viable *Ascaris* eggs**

96 The protocol for spiking pig faeces and feeding tiger worms in the present study was  
97 based on a study that assessed STH contamination in soil samples in Ethiopia<sup>49</sup>. In that  
98 study, *Ascaris* and *Trichuris* eggs were spiked into soil, followed by the addition of water  
99 and thorough homogenisation to validate and optimise the diagnostic method. The  
100 following step-by-step procedure is adapted from that methodology.

101 **1.** Wear a lab coat and gloves before starting the experiment to ensure safety and  
102 prevent contamination.

103 **2.** Prepare a 50 mL stock solution of viable *Ascaris* eggs by mixing raw concentrated  
104 *Ascaris* eggs with potassium dichromate at a 1:6 dilution ratio. The stock solution was  
105 freshly prepared every Monday.

106 **3.** Take a 20  $\mu$ L aliquot from the prepared stock solution and count the number of viable  
107 eggs under a 25x magnification. Perform 8 replicates, along with 2 additional  
108 replicates by each of two laboratory technicians to assess reproducibility, for a total of  
109 12 replicates. Calculate the mean of all replicates to determine the egg concentration  
110 per microliter.

111 **4.** Take a 2 mL tube and prepare a 1 mL suspension by adding the appropriate volume  
112 of stock solution containing 8,000 eggs (equivalent to 80 eggs per gram<sup>44</sup>). Add tap  
113 water to bring the total volume to 1 mL.

114 **5.** Weigh 100 g of fresh pig faeces using a 200 mL disposable plastic beaker and a scale,  
115 handling the sample with a wooden stick.

116 **6.** Mix the egg suspension in the 2 mL tube by aspirating and dispensing three times  
117 with a 1 mL pipette to ensure uniform distribution.

118 **7.** Evenly spike the egg suspension over the entire surface of the weighed faeces to  
119 ensure full coverage.

120 **8.** Add 1 mL of water along the inner surface of the 2 mL tube to rinse any remaining  
121 eggs and pour over the faeces. Repeat this rinsing and spiking step three times.

122 **9.** Mix the spiked faeces thoroughly using a metal spatula by pushing downward 10  
123 times, followed by further mixing to ensure even distribution of eggs.

124 **10.** Open the lid of the biodigester and the control systems, spread the spiked pig faeces  
125 evenly across the entire surface, covering all sides and corners.

126 **11.** Add 20 mL of water to the 200 mL beaker, rinse and mix with the metal spatula, then  
127 pour the liquid uniformly over the faeces in the container. Repeat this rinsing step  
128 three times to ensure complete transfer of all faeces particles.

129 **12.** Wash the metal spatula with detergent and a brush. Discard the beaker, tube, and  
130 wooden stick in the hazardous waste bin. Clean the work surface with a sponge and  
131 spray disinfectant over the entire area where the experiment was performed.

132

133

134

135

136

137

138

139

140

#### SI4. Viability protocol: Vital Dye Staining of *Ascaris* eggs

141

142 **1.** A staining solution was prepared by mixing 9 mL of 1× phosphate-buffered saline  
143 (PBS) with 1 mL of propidium iodide (1 mg/mL in 0.1× PBS, pH 7.2), resulting in a  
144 total volume of 10 mL.

145 **2.** From the prepared staining solution, 1 mL was added to the washed *Ascaris* eggs  
146 sample previously processed using the multiple-straining method.

147 **3.** The sample was incubated on an orbital shaker at 150 rpm for 30 minutes at room  
148 temperature, protected from light to prevent photobleaching of the fluorescent dye.

149 **4.** Following incubation, 1× PBS was added to the tube to reach a total volume of 50 mL.

150 **5.** The sample was centrifuged at 800 x g for 5 minutes to pellet the eggs. The  
151 supernatant was then carefully decanted, leaving approximately 5 mL of sediment.

152 **6.** A 50 µL aliquot from the prepared sample was pipetted onto a clean glass microscope  
153 slide, covered with a coverslip, and examined under a fluorescence microscope.

154 **7.** Propidium iodide intercalates into DNA but only penetrates cells or eggs with  
155 compromised membranes. Therefore, eggs that fluoresce red under the microscope  
156 are considered **non-viable**, while those that do not take up the dye and remain  
157 unstained are classified as **viable**.

158

159

160

161

162

163

164

165 **Table SI5. The analytical performance of the multiple-straining method on the**  
 166 **vermicompost**

| <b>N° of eggs</b>                  | <b>N° of replicates</b> | <b>N° of slides with a positive test result</b> | <b>Percent of slides with a positive test (95% CI)</b> | <b>Median recovery percentage for positive test (min, max)</b> |
|------------------------------------|-------------------------|-------------------------------------------------|--------------------------------------------------------|----------------------------------------------------------------|
| 0                                  | 8                       | 0                                               | 0 (0–32.4)                                             | 0 (0–0)                                                        |
| 50                                 | 8                       | 5                                               | 62.5 (30.6–86.3)                                       | 50.0 (0–150)                                                   |
| 100                                | 8                       | 8                                               | 100 (67.6–100)                                         | 62.5 (50–125)                                                  |
| 200                                | 8                       | 8                                               | 100 (67.6–100)                                         | 81.3 (75–125)                                                  |
| 400                                | 8                       | 8                                               | 100 (67.6–100)                                         | 84.4 (75–125)                                                  |
| <b>Recovery across</b>             |                         |                                                 |                                                        |                                                                |
| spiking levels<br>(50,100,200,400) | 32                      | 29                                              | 90.60%                                                 | 72%                                                            |

167

168

169

170 **Table SI6. The analytical performance of the multiple-straining method on pig**  
 171 **faeces**

| <b>N° of eggs</b>                    | <b>N° of replicates</b> | <b>N° of slides with a positive test result</b> | <b>Percent of slides with a positive test (95% CI)</b> | <b>Median recovery percentage for positive test (min, max)</b> |
|--------------------------------------|-------------------------|-------------------------------------------------|--------------------------------------------------------|----------------------------------------------------------------|
| 0                                    | 8                       | 0                                               | 0 (0)                                                  | 0(0)                                                           |
| 50                                   | 8                       | 6                                               | 75 (40.9–92.9)                                         | 75 (0–200)                                                     |
| 100                                  | 8                       | 8                                               | 100 (67.6–100)                                         | 75 (75–150)                                                    |
| 200                                  | 8                       | 8                                               | 100 (67.6–100)                                         | 81.3 (75–113)                                                  |
| 400                                  | 8                       | 8                                               | 100 (67.6–100)                                         | 84.4 (75–100)                                                  |
| <b>Recovery across</b>               |                         |                                                 |                                                        |                                                                |
| spiking levels<br>(50,100, 200, 400) | 32                      | 30                                              | 93.78%                                                 | 78%                                                            |

172

173

174

175

| Containers | Coir                        | Gravel                    | Effluent             | Vermicompos<br>t       | Pig faeces                  |
|------------|-----------------------------|---------------------------|----------------------|------------------------|-----------------------------|
| B1         | 133,993<br>(73,052–194,934) | 9,510<br>(4,460–14,560)   | 302<br>(76–528)      | 4,380<br>(3,093–5,667) | Not Applicable              |
| B2         | 121,946<br>(51,957–191,935) | 15,949<br>(8,279–23,619)  | 368<br>(272–464)     | 4,103<br>(2,504–5,702) | Not Applicable              |
| B3         | 117,784<br>(89,125–146,443) | 22,225<br>(8,896–35,554)  | 653<br>(485–821)     | 3,563<br>(2,055–5,071) | Not Applicable              |
| B4         | 122,061<br>(76,312–167,810) | 17,503<br>(6,092–28,914)  | 1,150<br>(267–2,033) | 3,961<br>(1,104–6,818) | Not Applicable              |
| B5         | 121,360<br>(67,760–175,200) | 22,821<br>(10,005–35,637) | 300<br>(76–524)      | 3,171<br>(1,397–4,945) | Not Applicable              |
| B6         | 92020<br>(16,320–167,720)   | 39,366<br>(26,797–51,935) | 1,079<br>(897–1,261) | 3,300<br>(2,253–4,347) | Not Applicable              |
| C1         | 3,575 (0–9,144)             | 0 (0–0)                   | 0 (0–0)              | Not Applicable         | 148,511<br>(83,468–213,554) |
| C2         | 5,233 (0–10,784)            | 0 (0–0)                   | 0 (0–0)              | Not Applicable         | 142,137<br>(89,805–194,469) |
| C3         | 8,259 (0–30,265)            | 0 (0–0)                   | 0 (0–0)              | Not Applicable         | 146,025<br>(76,238–215,812) |

179 **Table SI8. Pairwise layer combinations for Wilcoxon tests on the biodigesters and**  
 180 **the control units**

| <b>Containers</b>               | <b>Layer–combination 1</b> | <b>Layer–combination 2</b> | <b>Median difference<br/>(eggs)</b> | <b>p-value</b> |
|---------------------------------|----------------------------|----------------------------|-------------------------------------|----------------|
| <b>Biodigesters<br/>(B1–6)</b>  | Coir                       | Gravel                     | 101,548.50                          | 0.03           |
|                                 | Coir                       | Effluent                   | 120,985.50                          | 0.03           |
|                                 | Coir                       | Vermicompost               | 117,971.50                          | 0.03           |
|                                 | Gravel                     | Effluent                   | 18,962.50                           | 0.03           |
|                                 | Gravel                     | Vermicompost               | 16,102.00                           | 0.03           |
|                                 | Effluent                   | Vermicompost               | 2,890.50                            | 0.03           |
| <b>Control units<br/>(C1–3)</b> | Coir                       | Gravel                     | 5,233.13                            | 0.18           |
|                                 | Coir                       | Effluent                   | 5,233.13                            | 0.18           |
|                                 | Coir                       | Pig faeces                 | 137,765.62                          | 0.18           |
|                                 | Gravel                     | Effluent                   | 0.00                                | 0.18           |
|                                 | Gravel                     | Pig faeces                 | 146,025.0                           | 0.18           |
|                                 | Effluent                   | Pig faeces                 | 146,025.0                           | 0.18           |
